# Supplementary material for: Drought susceptibility of modern rice varieties: an effect of linkage of drought tolerance with undesirable traits
Source: PubMed Central journal article supplement (PMC4602206; doi:10.1038/srep14799), 2015-10-13
Supplement: srep14799-s1.pdf [file srep14799-s1.pdf]

Drought susceptibility of modern rice varieties: an effect of linkage of drought tolerance with undesirable traits

Prashant Vikram<sup>1†</sup>, Mallikarjuna Swamy<sup>1</sup>, Shalabh Dixit<sup>1</sup>, Renu Singh<sup>2</sup>, Bikram P. Singh<sup>2</sup>, Berta Miro<sup>1</sup>, Ajay Kohli<sup>1</sup>, Amelia Henry<sup>1</sup>, N.K. Singh<sup>2</sup> and Arvind Kumar<sup>1\*</sup>

<sup>1</sup>Plant Breeding, Genetics, and Biotechnology Division, International Rice Research Institute, Los Baños, Philippines

<sup>2</sup>National Research Center for Plant Biology, Indian Agricultural Research Institute, New Delhi, India 110012

\*Corresponding author e-mail: [a.kumar@irri.org](mailto:a.kumar@irri.org)

<sup>†</sup>Present Address: Genetic Resource Program, Centro Internacional de Mejoramiento de Maíz y Trigo (CIMMYT), Km. 45 Carretera México-Veracruz, Col. El Batán, Texcoco, Edo. de Mex. 56130, México

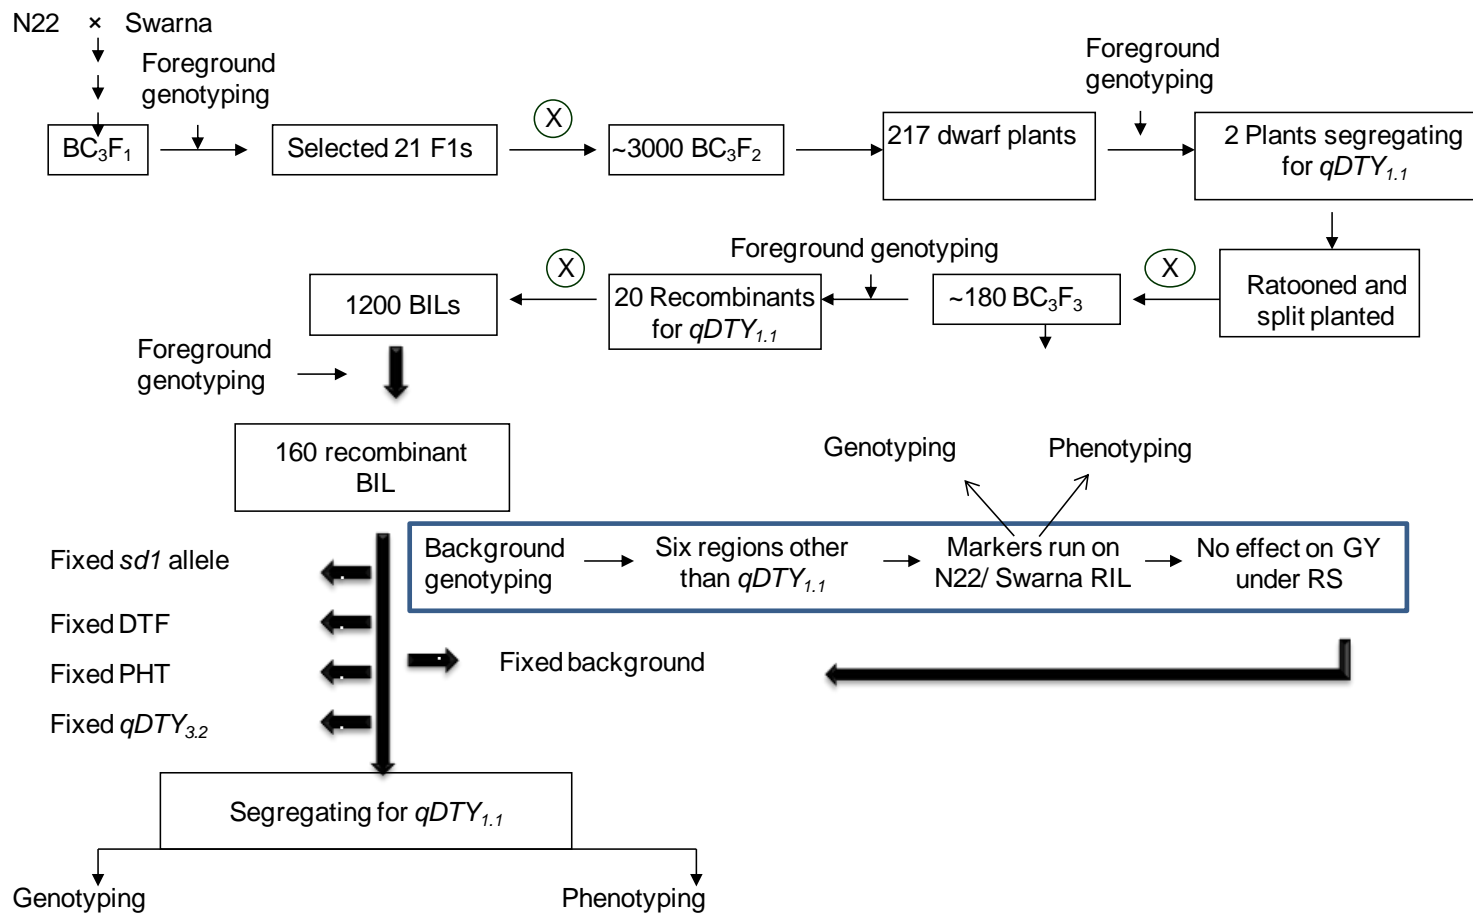

Figure S1: Development of the N22/Swarna BIL population with fixed *sd1* allele for semi-dwarf height and synchronized plant height (PH) and days to 50% flowering (DTF) similar to those of Swarna and minimized background effects.

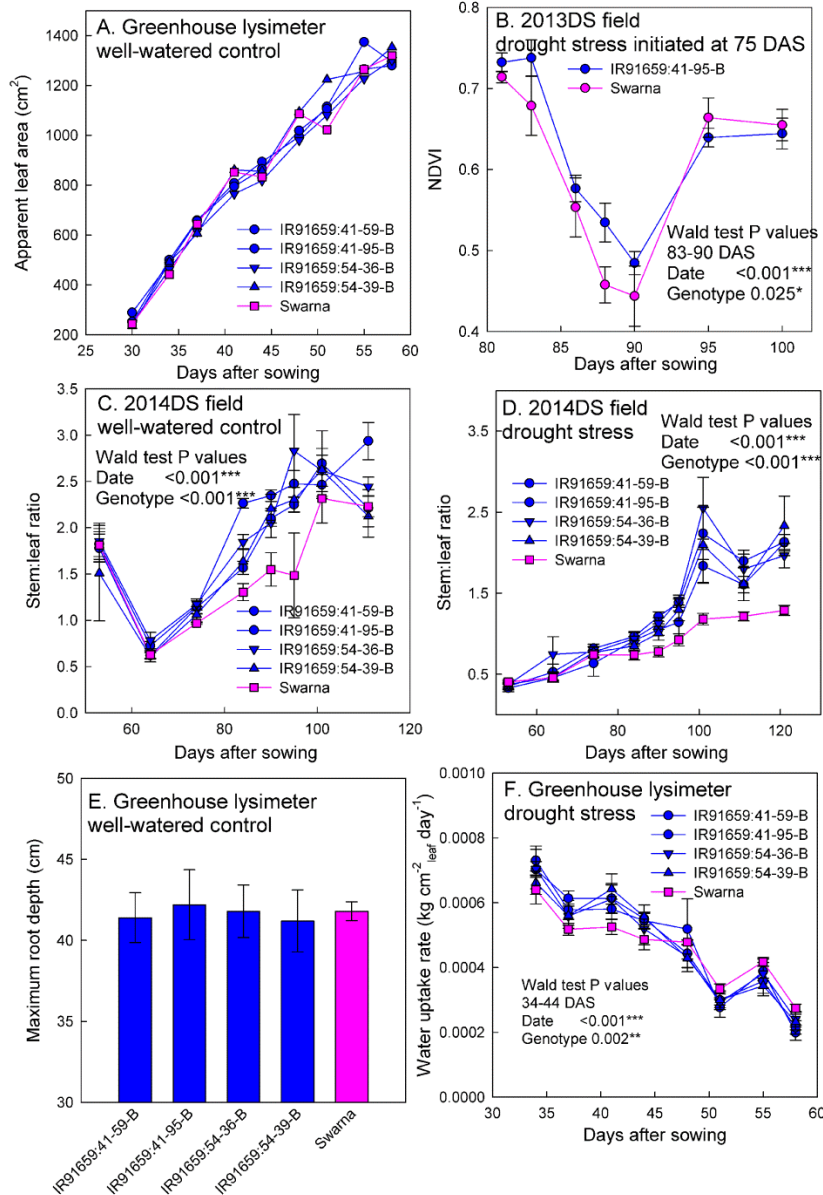

Figure S2: A) Apparent leaf area in the well-watered control treatment of the greenhouse lysimeter experiment, B) normalized difference vegetation index (NDVI) in the 2013 DS field drought stress treatment, C) stem:leaf ratio in the 2014 DS field well-watered control treatment, D) stem:leaf ratio in the 2014 DS field drought stress treatment, E) maximum root depth at the end of the study in the well-watered control treatment of the greenhouse lysimeter experiment, and F) water uptake rates in the drought stress treatment of the greenhouse lysimeter experiment.

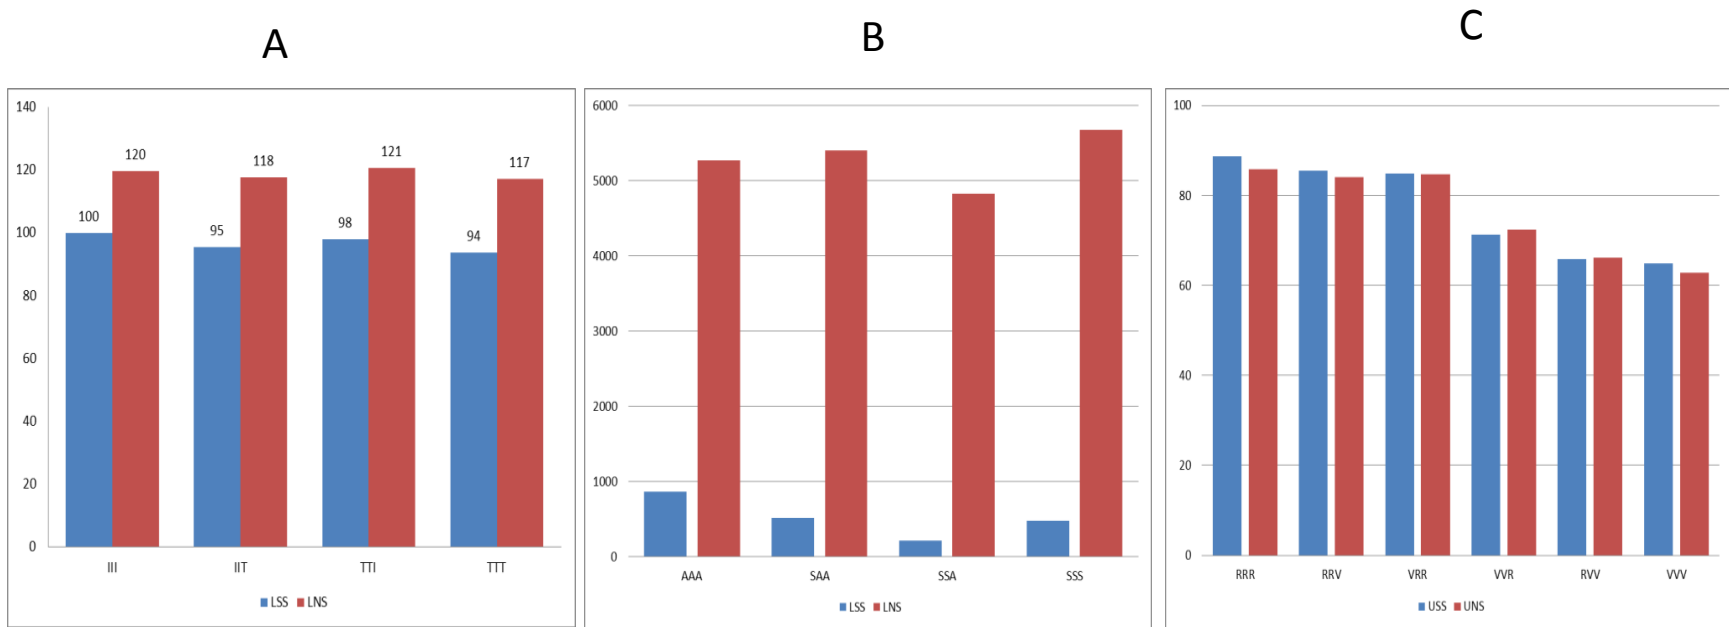

Figure S3: Class analysis with marker loci within (A)  $qDTY_{6.2}$  (RM3, RM541, and RM275), (B)  $qDTY_{3.1}$  (RM520, RM416, and RM16030), and (C)  $qDTY_{3.2}$  (RM7332, RM523, and RM545), in IR55419-04/2\* TDK1, Apo/3\*Swarna, and Vandana/Way Rarem populations, respectively. Bar graphs show different degree of effects of recombinant classes on GY under non-stress conditions, DTF, and PH for the three QTLs, respectively.

$qDTY_{6.2}$  (RM3, RM541, and RM275): I, IR55419-04 allele; T, TDK1 allele;

$qDTY_{3.1}$  (RM520, RM416, and RM16030): S, Swarna allele; A, Apo allele

$qDTY_{3.2}$  (RM7332, RM523, and RM545): V, Vandana allele; R, Way Rarem allele

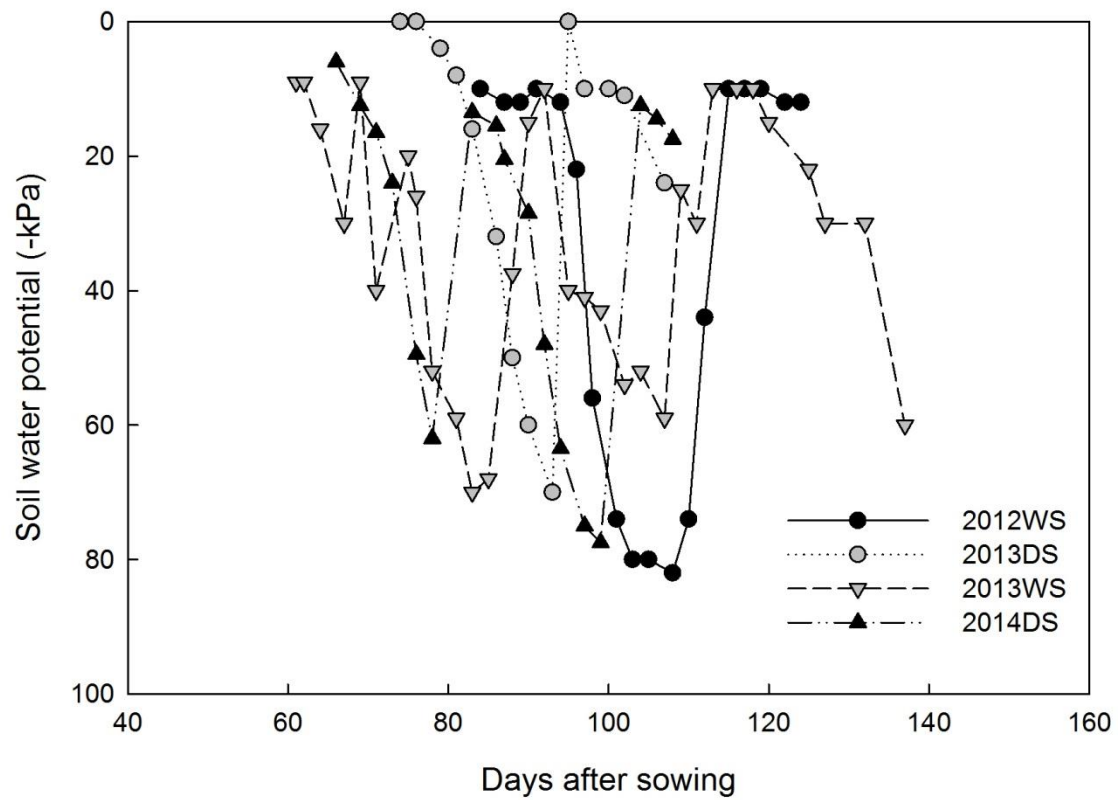

Figure S4: Soil water potential at a depth of 30 cm as measured by tensiometers in the drought stress treatments of the field physiology studies.

Table S1: Phenotypic variation for GY related traits under RS and NS in the dwarf N22/Swarna BIL population

|           | DTF (d)    |          | PHT (cm)   |         | BIO (kg ha <sup>-1</sup> ) |              | GY (kg ha <sup>-1</sup> ) |            | HI            |              |
|-----------|------------|----------|------------|---------|----------------------------|--------------|---------------------------|------------|---------------|--------------|
|           | NON STRESS | STRESS   | NON STRESS | STRESS  | NON STRESS                 | STRESS       | NON STRESS                | STRESS     | NON STRESS    | STRESS       |
| DS2012    |            |          |            |         |                            |              |                           |            |               |              |
| MEAN ± SD | 96 ± 7     | 100 ± 6  | 94 ± 6     | 72 ± 5  | 17790 ± 5988               | 10760 ± 7801 | 5448 ± 2160               | 1872 ± 696 | 0.296 ± 0.078 | 0.21 ± 0.13  |
| RANGE     | 59 – 127   | 70 – 119 | 64 – 122   | 52 – 88 | 1628 – 33740               | 698 – 21040  | 557 – 11590               | 0 – 6869   | 0.043 – 0.50  | 0.001 – 0.44 |
| LSD       | 12.7       | 6.3      | 9.9        | 9.9     | 12104                      | 5615         | 4001                      | 1304       | 0.2           | 0.3          |
| DS2013    |            |          |            |         |                            |              |                           |            |               |              |
| MEAN ± SD | 88 ± 6     | 92 ± 6   | 84 ± 6     | 67 ± 6  | 15490 ± 4539               | 9347 ± 2459  | 5341 ± 1530               | 1735 ± 624 | 0.401 ± 0.06  | 0.21 ± 0.09  |
| RANGE     | 62 – 99    | 62 – 105 | 71 – 112   | 52 – 99 | 2450 – 33350               | 845 – 21650  | 368 – 10970               | 71 – 4238  | 0.105 – 0.499 | 0.001 – 0.50 |
| LSD       | 5.4        | 5.6      | 7.3        | 9.7     | 180                        | 9.7          | 516                       | 315        | 0.82          | 0.25         |

Table S2: List of 123 genotypes/varieties used for the *qDTY<sub>1.1</sub>/sd1* association with GY under RS.

| S.N. | Genotype/variety          | S.N. | Genotype/variety    | S.N. | Genotype/variety                     | S.N. | Genotype/variety        | S.N. | Genotype/variety                   |
|------|---------------------------|------|---------------------|------|--------------------------------------|------|-------------------------|------|------------------------------------|
| 1    | AI JIAO NAN TE            | 26   | CR 1014             | 51   | JIRASAIL                             | 76   | MTU1010                 | 101  | RTS 12                             |
| 2    | ANNADA                    | 27   | DAVAO               | 52   | JOYNA                                | 77   | MUEY NONG (WANG<br>DIN) | 102  | RTS 14                             |
| 3    | APO                       | 28   | DEE-GEO-WOO-<br>GEN | 53   | KAJALSAIL                            | 78   | N22                     | 103  | RTS 5                              |
| 4    | BALAM                     | 29   | DHAGAD DESHI        | 54   | KALAKERI                             | 79   | NAN TE HAO              | 104  | SAFRI 17                           |
| 5    | BASHFUL                   | 30   | DHALASAITA          | 55   | KALAMKATI                            | 80   | NAZIRSAIL               | 105  | SAMBA MAHSURI                      |
| 6    | BASMATI 334               | 31   | DHOLI BORO          | 56   | KALIJIRA                             | 81   | NIAW                    | 106  | SARJOO 50                          |
| 7    | BASMATI 370               | 32   | DINORADO            | 57   | KAO TAH KONG                         | 82   | NSIC RC 192             | 107  | SARJU 49                           |
| 8    | BENGAWAN                  | 33   | DURGABHOG           | 58   | KASALATH                             | 83   | NSIC RC 222             | 108  | SATHI 34-36                        |
| 9    | BETONAN                   | 34   | GIE 57              | 59   | KATARIBHOG                           | 84   | NSICRC 9                | 109  | SMAGUING<br>SINAMPAGA<br>SELECTION |
| 10   | BHADOIA 233               | 35   | GS 529;DULAR        | 60   | KHAO DAWK MALI 105                   | 85   | PANKAJ (IR 5-114-3-1)   | 110  | SOM CAU 70 A                       |
| 11   | BINNATOHA                 | 36   | HOING               | 61   | KHAO GAEW                            | 86   | PELITA I 1              | 111  | SWARNA                             |
| 12   | BLACK GORA                | 37   | IR 1561-228-3-3     | 62   | KHAO HAWM                            | 87   | PELITA I 2              | 112  | T 1                                |
| 13   | BPI RI 10                 | 38   | IR 36               | 63   | KHAO TAH OO                          | 88   | PSBRC 68                | 113  | T 136                              |
| 14   | BR 1                      | 39   | IR 42               | 64   | KHAO TAH HAENG                       | 89   | PSBRC 80                | 114  | TADUKAN                            |
| 15   | BR 11                     | 40   | IR 64               | 65   | KHAO TAH PIENG                       | 90   | PSBRC 82                | 115  | TAICHUNG 65                        |
| 16   | BR 2                      | 41   | IR 8                | 66   | KU 113-1                             | 91   | PURBACHI (CHINESE 1)    | 116  | TAICHUNG NATIVE 1                  |
| 17   | BR 21                     | 42   | IR74371-46-1-1      | 67   | LALSAR                               | 92   | RASI                    | 117  | TKM 6                              |
| 18   | BROWN GORA<br>CHAMPA TONG | 43   | IR74371-70-1-1      | 68   | LATISAIL                             | 93   | RATNA                   | 118  | UPLRI 4                            |
| 19   | 54                        | 44   | IRRI 119            | 69   | LEUANG YAI NONG                      | 94   | RD 1                    | 119  | UPLRI 7                            |
| 20   | CHAU                      | 45   | IRRI 123            | 70   | MACAN BINUNDOK<br>MAGAWK DONG 269-7- | 95   | RD 15                   | 120  | VANDANA                            |
| 21   | CHIEM CHANH               | 46   | IRRI 141            | 71   | 7 (9)                                | 96   | RD 2                    | 121  | WAGWAG                             |
| 22   | CHINIGURA                 | 47   | JAGANATH            | 72   | MAHSURI                              | 97   | RD 25                   | 122  | ZHENSHAN 2                         |
| 23   | CIKAPUNDUNG               | 48   | JAYA                | 73   | MAKMUR                               | 98   | RD 6                    |      |                                    |
| 24   | CO 18                     | 49   | JC 148              | 74   | MARINAH                              | 99   | RD 7                    |      |                                    |
| 25   | CO 25                     | 50   | JHONA 349           | 75   | MOHINI SAIL                          | 100  | RD 9                    |      |                                    |

Table S3: Phenotypic variation for grain yield (GY)-related traits under reproductive-stage stress (RS) and non-stress (NS) in random varieties of medium duration.

|           | DTF (d)    |          | PHT (cm)   |          | BIO (kg ha <sup>-1</sup> ) |              | GY (kg ha <sup>-1</sup> ) |             | HI           |                |
|-----------|------------|----------|------------|----------|----------------------------|--------------|---------------------------|-------------|--------------|----------------|
|           | NON STRESS | STRESS   | NON STRESS | STRESS   | NON STRESS                 | STRESS       | NON STRESS                | STRESS      | NON STRESS   | STRESS         |
| DS2012    |            |          |            |          |                            |              |                           |             |              |                |
| MEAN ± SD | 72 ± 9     | 71 ± 9   | 111 ± 18   | 99 ± 15  | 13280 ± 5430               | 9063 ± 4045  | 3880 ± 1794               | 2534 ± 1108 | 0.344 ± 0.07 | 0.313 ± 0.09   |
| RANGE     | 58 – 105   | 51 – 91  | 68 – 156   | 67 – 134 | 2835 – 30850               | 2650 – 33400 | 702 – 9278                | 363 – 5296  | 0.12 – 0.50  | 0.026 – 0.50   |
| LSD       | 6.7        | 5.8      | 23         | 12       | 9298                       | 4160         | 2391                      | 1512        | 0.11         | 0.13           |
| DS2013    |            |          |            |          |                            |              |                           |             |              |                |
| MEAN ± SD | 81 ± 10    | 78 ± 8   | 100 ± 18   | 85 ± 15  | 12430 ± 4611               | 7052 ± 6394  | 3078 ± 1372               | 1178 ± 707  | 0.36 ± 0.09  | 0.39 ± 0.04    |
| RANGE     | 61 – 109   | 63 – 103 | 68 – 140   | 49 – 117 | 3650 – 43500               | 550 – 49000  | 372 – 10850               | 0.1 – 2807  | 0.04 – 0.49  | 0.00001 – 0.50 |
| LSD       | 7.3        | 5.1      | 15         | 21       | 10393                      | 14044        | 1974                      | 906         | 0.21         | 0.28           |



Table S4: Phenotypic variation for grain yield (GY)-related traits under reproductive-stage stress (RS) and non-stress (NS) in random varieties of late duration.

|           | DTF (d)    |          | PHT (cm)   |          | BIO (kg ha <sup>-1</sup> ) |              | GY (kg ha <sup>-1</sup> ) |             | NON STRESS   | HI           |
|-----------|------------|----------|------------|----------|----------------------------|--------------|---------------------------|-------------|--------------|--------------|
| DS2012    | NON STRESS | STRESS   | NON STRESS | STRESS   | NON STRESS                 | STRESS       | NON STRESS                | STRESS      | NON STRESS   | STRESS       |
| MEAN ± SD | 83 ± 12    | 88 ± 14  | 126 ± 19   | 113 ± 18 | 15180 ± 6905               | 12130 ± 5052 | 3206 ± 1863               | 2156 ± 1222 | 0.234 ± 0.11 | 0.21 ± 0.11  |
| RANGE     | 62 – 112   | 61 – 123 | 72 – 164   | 72 – 157 | 5204 – 40550               | 2300 – 38000 | 439 – 8120                | 14 – 5763   | 0.02 – 0.50  | 0.004 – 0.49 |
| LSD       | 23         | 11       | 39         | 20       | 15582                      | 9827         | 4172                      | 1573        | 0.26         | 0.15         |
| DS2013    |            |          |            |          |                            |              |                           |             |              |              |
| MEAN ± SD | 76 ± 13    | 86 ± 12  | 119 ± 20   | 103 ± 15 | 7707 ± 3198                | 3761 ± 1797  | 4372 ± 2006               | 1379 ± 1271 | 0.35 ± 0.09  | 0.18 ± 0.14  |
| RANGE     | 60 – 108   | 62 – 109 | 76 – 169   | 65 – 146 | 1946 – 17460               | 2100 – 16000 | 1319 – 8957               | 0 – 4711    | 0.07 – 0.49  | 0.001 – 0.50 |
| LSD       | 15         | 7        | 27         | 15       | 4335                       | 2184         | 3008                      | 815         | 0.22         | 0.25         |

Table S5: List of the candidate genes at the distal end of the *sd1* gene and tightly linked with RM431 (38.4–39.0 Mb).

| S.No. | feature | start    | end      | Locus name     | Putative function                                                           |
|-------|---------|----------|----------|----------------|-----------------------------------------------------------------------------|
| 1     | gene    | 38401207 | 38401533 | LOC_Os01g66120 | No apical meristem protein, putative, expressed                             |
| 2     | gene    | 38409201 | 38409365 | LOC_Os01g66130 | armadillo/beta-catenin repeat family protein, putative, expressed           |
| 3     | gene    | 38424266 | 38424621 | LOC_Os01g66140 | plus-3 domain containing protein, putative, expressed                       |
| 4     | gene    | 38432869 | 38433670 | LOC_Os01g66150 | expressed protein                                                           |
| 5     | gene    | 38435460 | 38437074 | LOC_Os01g66160 | pentatricopeptide, putative, expressed                                      |
| 6     | gene    | 38439863 | 38440460 | LOC_Os01g66170 | SNARE associated Golgi protein, putative, expressed                         |
| 7     | gene    | 38443627 | 38443810 | LOC_Os01g66180 | cytochrome c, putative, expressed                                           |
| 8     | gene    | 38450202 | 38450501 | LOC_Os01g66190 | expressed protein                                                           |
| 9     | gene    | 38460094 | 38460564 | LOC_Os01g66200 | expressed protein                                                           |
| 10    | gene    | 38465531 | 38465598 | LOC_Os01g66210 | retrotransposon protein, putative, Ty3-gypsy subclass                       |
| 11    | gene    | 38474878 | 38475218 | LOC_Os01g66230 | csAtPR5, putative, expressed                                                |
| 12    | gene    | 38475617 | 38475831 | LOC_Os01g66240 | mitochondrion protein, putative, expressed                                  |
| 13    | gene    | 38481235 | 38484007 | LOC_Os01g66250 | S-locus-like receptor protein kinase, putative, expressed                   |
| 14    | gene    | 38484468 | 38485604 | LOC_Os01g66260 | expressed protein                                                           |
| 15    | gene    | 38489525 | 38490169 | LOC_Os01g66270 | AP2 domain containing protein, expressed                                    |
| 16    | gene    | 38493839 | 38494134 | LOC_Os01g66280 | transcriptional regulator, putative, expressed                              |
| 17    | gene    | 38500880 | 38501056 | LOC_Os01g66290 | OsMADS21 - MADS-box family gene with MIKCC type-box, expressed              |
| 18    | gene    | 38509123 | 38509734 | LOC_Os01g66300 | KH domain containing protein, putative, expressed                           |
| 19    | gene    | 38516417 | 38516517 | LOC_Os01g66310 | expressed protein                                                           |
| 20    | gene    | 38519987 | 38520259 | LOC_Os01g66320 | expressed protein                                                           |
| 21    | gene    | 38525642 | 38526409 | LOC_Os01g66330 | ATP-dependent Clp protease ATP-binding subunit clpX, putative, expressed    |
| 22    | gene    | 38527961 | 38528185 | LOC_Os01g66340 | expressed protein                                                           |
| 23    | gene    | 38534823 | 38535329 | LOC_Os01g66350 | DUF647 domain containing protein, putative, expressed                       |
| 24    | gene    | 38541818 | 38542109 | LOC_Os01g66360 | 2-C-methyl-D-erythritol 4-phosphate cytidyltransferase, putative, expressed |

---

|    |      |          |          |                |                                                                         |
|----|------|----------|----------|----------------|-------------------------------------------------------------------------|
| 25 | gene | 38557970 | 38558381 | LOC_Os01g66379 | expressed protein                                                       |
| 26 | gene | 38559137 | 38559341 | LOC_Os01g66400 | expressed protein                                                       |
| 27 | gene | 38561851 | 38561924 | LOC_Os01g66410 | expressed protein                                                       |
| 28 | gene | 38570487 | 38570861 | LOC_Os01g66420 | PHD finger protein, putative, expressed                                 |
| 29 | gene | 38574115 | 38574132 | LOC_Os01g66440 | expressed protein                                                       |
| 30 | gene | 38582407 | 38582574 | LOC_Os01g66450 | retrotransposon protein, putative, unclassified, expressed              |
| 31 | gene | 38587950 | 38588740 | LOC_Os01g66460 | retrotransposon protein, putative, Ty3-gypsy subclass, expressed        |
| 32 | gene | 38589984 | 38591752 | LOC_Os01g66470 | retrotransposon protein, putative, Ty3-gypsy subclass, expressed        |
| 33 | gene | 38594450 | 38594743 | LOC_Os01g66480 | expressed protein                                                       |
| 34 | gene | 38611435 | 38612105 | LOC_Os01g66490 | no apical meristem protein, putative, expressed                         |
| 35 | gene | 38623771 | 38623836 | LOC_Os01g66500 | phosphoribosylformylglycinamide synthase, putative, expressed           |
| 36 | gene | 38627746 | 38628127 | LOC_Os01g66510 | MLO domain containing protein, putative, expressed                      |
| 37 | gene | 38635322 | 38635651 | LOC_Os01g66520 | serine/threonine-protein kinase RIO-like, putative, expressed           |
| 38 | gene | 38637331 | 38638234 | LOC_Os01g66530 | ARGOS, putative, expressed                                              |
| 39 | gene | 38645466 | 38645708 | LOC_Os01g66544 | expressed protein                                                       |
| 40 | gene | 38650518 | 38650715 | LOC_Os01g66560 | signal recognition particle 72 kDa protein, putative, expressed         |
| 41 | gene | 38655236 | 38656447 | LOC_Os01g66570 | ZOS1-19 - C2H2 zinc finger protein, expressed                           |
| 42 | gene | 38661257 | 38661310 | LOC_Os01g66580 | RNA polymerase III RPC4 domain containing protein, expressed            |
| 43 | gene | 38676217 | 38676530 | LOC_Os01g66590 | DUF260 domain containing protein, putative, expressed                   |
| 44 | gene | 38687370 | 38688097 | LOC_Os01g66600 | rhodanese-like, putative, expressed                                     |
| 45 | gene | 38692318 | 38692621 | LOC_Os01g66610 | serine/threonine-protein kinase receptor precursor, putative, expressed |
| 46 | gene | 38696091 | 38696135 | LOC_Os01g66620 | glucosyltransferase, putative, expressed                                |
| 47 | gene | 38699042 | 38699146 | LOC_Os01g66630 | S-domain receptor-like protein kinase, putative, expressed              |
| 48 | gene | 38704701 | 38704872 | LOC_Os01g66640 | S-domain receptor-like protein kinase, putative, expressed              |
| 49 | gene | 38716611 | 38716756 | LOC_Os01g66650 | expressed protein                                                       |
| 50 | gene | 38718491 | 38719023 | LOC_Os01g66660 | expressed protein                                                       |
| 51 | gene | 38723347 | 38724165 | LOC_Os01g66670 | expressed protein                                                       |
| 52 | gene | 38729814 | 38729926 | LOC_Os01g66680 | S-domain receptor-like protein kinase, putative, expressed              |
| 53 | gene | 38736544 | 38737856 | LOC_Os01g66690 | ZIP4/SPO22, putative, expressed                                         |
| 54 | gene | 38745734 | 38745918 | LOC_Os01g66700 | beta-hexosaminidase precursor, putative, expressed                      |

---

|    |      |          |          |                |                                                                                                                             |
|----|------|----------|----------|----------------|-----------------------------------------------------------------------------------------------------------------------------|
| 55 | gene | 38749035 | 38749487 | LOC_Os01g66710 | polygalacturonase, putative, expressed                                                                                      |
| 56 | gene | 38752611 | 38752935 | LOC_Os01g66720 | NADP-dependent oxidoreductase, putative, expressed                                                                          |
| 57 | gene | 38759291 | 38759513 | LOC_Os01g66730 | exosome complex exonuclease RRP40, putative, expressed                                                                      |
| 58 | gene | 38759757 | 38759950 | LOC_Os01g66740 | inactive receptor kinase At1g27190 precursor, putative, expressed                                                           |
| 59 | gene | 38767579 | 38768280 | LOC_Os01g66750 | retrotransposon protein, putative, unclassified, expressed                                                                  |
| 60 | gene | 38770126 | 38770260 | LOC_Os01g66760 | inactive receptor kinase At2g26730 precursor, putative, expressed                                                           |
| 61 | gene | 38778041 | 38778137 | LOC_Os01g66780 | retrotransposon protein, putative, unclassified                                                                             |
| 62 | gene | 38785135 | 38786060 | LOC_Os01g66790 | retrotransposon protein, putative, unclassified, expressed                                                                  |
| 63 | gene | 38788306 | 38788417 | LOC_Os01g66800 | expressed protein                                                                                                           |
| 64 | gene | 38790403 | 38790510 | LOC_Os01g66810 | expressed protein                                                                                                           |
| 65 | gene | 38795480 | 38795636 | LOC_Os01g66820 | inactive receptor kinase At1g27190 precursor, putative, expressed                                                           |
| 66 | gene | 38803740 | 38803908 | LOC_Os01g66830 | pectinacetyltransferase domain containing protein, expressed                                                                |
| 67 | gene | 38810316 | 38810451 | LOC_Os01g66840 | pectinacetyltransferase domain containing protein, expressed                                                                |
| 68 | gene | 38815050 | 38815179 | LOC_Os01g66850 | pectinacetyltransferase domain containing protein, expressed                                                                |
| 69 | gene | 38838619 | 38840001 | LOC_Os01g66870 | transposon protein, putative, CACTA, En/Spm sub-class, expressed                                                            |
| 70 | gene | 38843725 | 38843862 | LOC_Os01g66890 | BTBZ1 - Bric-a-Brac, Tramtrack, and Broad Complex BTB domain with TAZ zinc finger and Calmodulin-binding domains, expressed |
| 71 | gene | 38854092 | 38854277 | LOC_Os01g66900 | expressed protein                                                                                                           |
| 72 | gene | 38859999 | 38860214 | LOC_Os01g66910 | expressed protein                                                                                                           |
| 73 | gene | 38864020 | 38864322 | LOC_Os01g66920 | Ser/Thr protein phosphatase family protein, putative, expressed                                                             |
| 74 | gene | 38887107 | 38887723 | LOC_Os01g66940 | kinase, pfkB family, putative, expressed                                                                                    |
| 75 | gene | 38888805 | 38889245 | LOC_Os01g66950 | expressed protein                                                                                                           |
| 76 | gene | 38891151 | 38891518 | LOC_Os01g66960 | selenoprotein precursor, putative, expressed                                                                                |
| 77 | gene | 38897220 | 38897714 | LOC_Os01g66970 | zinc finger, C3HC4 type domain containing protein, expressed                                                                |
| 78 | gene | 38902608 | 38902752 | LOC_Os01g66980 | expressed protein                                                                                                           |
| 79 | gene | 38909394 | 38909598 | LOC_Os01g66990 | expressed protein                                                                                                           |
| 80 | gene | 38915255 | 38915492 | LOC_Os01g67000 | membrane-associated 30 kDa protein, chloroplast precursor, putative, expressed                                              |
| 81 | gene | 38916092 | 38916366 | LOC_Os01g67010 | expressed protein                                                                                                           |
| 82 | gene | 38924789 | 38925118 | LOC_Os01g67030 | auxin-responsive protein, putative, expressed                                                                               |
| 83 | gene | 38928602 | 38930270 | LOC_Os01g67040 | OsRhmbd5 - Putative Rhomboid homologue, expressed                                                                           |

---

|    |      |          |          |                |                                                                  |
|----|------|----------|----------|----------------|------------------------------------------------------------------|
| 84 | gene | 38934590 | 38934770 | LOC_Os01g67054 | calreticulin precursor protein, putative, expressed              |
| 85 | gene | 38938902 | 38939459 | LOC_Os01g67070 | expressed protein                                                |
| 86 | gene | 38945620 | 38945638 | LOC_Os01g67080 | expressed protein                                                |
| 87 | gene | 38946700 | 38946868 | LOC_Os01g67090 | IQ calmodulin-binding motif domain containing protein, expressed |

---

Table S6: The details of *qDTY*<sub>1.1</sub> custom SNP markers used for genotyping.

| SNP_ID           | 2nd-PCR<br>P                                   | 1st-PCR<br>P                                        | AM<br>P_L<br>EN | UP_<br>CON<br>F | MP_<br>CON<br>F | Tm(<br>NN) | PcG<br>C | P<br>W<br>AR<br>N | UEP<br>_DI<br>R | UEP_<br>MASS | UEP_SEQ                               | EXT<br>1_C<br>ALL | EXT1<br>_MA<br>SS | EXT1_SEQ                               | EXT2<br>_CA<br>LL | EXT2<br>_MA<br>SS | EXT2_SEQ                               |
|------------------|------------------------------------------------|-----------------------------------------------------|-----------------|-----------------|-----------------|------------|----------|-------------------|-----------------|--------------|---------------------------------------|-------------------|-------------------|----------------------------------------|-------------------|-------------------|----------------------------------------|
| nksdty1_1_0<br>1 | ACGTTGG<br>ATGAAGC<br>TGATGGA<br>AAGAGGG<br>AG | ACGTTG<br>GATGCT<br>GAATTA<br>TGAAA<br>CCGGA<br>AC  | 106             | 94.2            | 75.1            | 52         | 57.<br>9 | D                 | R               | 5779.<br>8   | CTCCTAA<br>GGTGGAT<br>CCTGC           | G                 | 6027              | CTCCTAAG<br>GTGGATC<br>CTGCC           | A                 | 6107              | CTCCTAA<br>GGTGGAT<br>CCTGCT           |
| nksdty1_1_0<br>2 | ACGTTGG<br>ATGGACA<br>TGTATAGT<br>GGCCTGA<br>C | ACGTTG<br>GATGG<br>AAGGA<br>TACCTG<br>GTCTTT<br>TG  | 92              | 98.3            | 75.1            | 48.3       | 31.<br>8 | d                 | R               | 7307.<br>8   | ttTCAACA<br>CTGAGAT<br>TGATTCT<br>TT  | T                 | 7579              | ttTCAACA<br>CTGAGAT<br>TGATTCTT<br>TA  | C                 | 7595              | ttTCAACA<br>CTGAGAT<br>TGATTCTT<br>TG  |
| nksdty1_1_0<br>4 | ACGTTGG<br>ATGCCTGC<br>TGTACTCT<br>GCTTTAG     | ACGTTG<br>GATGG<br>CCAACA<br>AGCAG<br>AATTTC<br>AAG | 120             | 93              | 75.1            | 45.6       | 33.<br>3 | D                 | F               | 7633         | taagTGAA<br>CAATCTG<br>ACTCATA<br>ATC | C                 | 7880              | taagTGAA<br>CAATCTG<br>ACTCATAA<br>TCC | T                 | 7960              | taagTGAA<br>CAATCTG<br>ACTCATA<br>ATCT |
| nksdty1_1_0<br>5 | ACGTTGG<br>ATGTTATG<br>ATGCCACA<br>GCCTCTC     | ACGTTG<br>GATGC<br>AAGAT<br>GAAGA<br>CAGCA<br>ATAGG | 101             | 94.5            | 75.1            | 46.1       | 43.<br>8 | D                 | F               | 5376.<br>5   | ccTGCTCC<br>ATCTGCA<br>TTT            | C                 | 5624              | ccTGCTCC<br>ATCTGCAT<br>TTC            | G                 | 5664              | ccTGCTCC<br>ATCTGCA<br>TTTG            |

|                  |                                                |                                                    |     |      |      |      |          |    |   |            |                                      |   |      |                                      |   |      |                                      |
|------------------|------------------------------------------------|----------------------------------------------------|-----|------|------|------|----------|----|---|------------|--------------------------------------|---|------|--------------------------------------|---|------|--------------------------------------|
| nksdty1_1_0<br>6 | ACGTTGG<br>ATGCGCC<br>GACTATA<br>GAGGGTT<br>C  | ACGTTG<br>GATGA<br>ATCGCT<br>GCAAC<br>GGTAA<br>CGG | 103 | 94.5 | 75.1 | 46.8 | 50       | DH | F | 6238.<br>1 | gggcTAG<br>AGGGTTC<br>GCTGAA         | C | 6485 | gggcTAGA<br>GGGTTTCG<br>CTGAAC       | T | 6565 | GCGACAG<br>CTCCTCA<br>TCTCCTCG<br>C  |
| nksdty1_1_0<br>7 | ACGTTGG<br>ATGGTGC<br>CCAAGGC<br>CATCGTGC      | ACGTTG<br>GATGT<br>AGAGG<br>CGGTA<br>CTTCTG<br>GAG | 106 | 81.6 | 75.1 | 52.2 | 52.<br>9 | D  | F | 5170.<br>4 | ATCGTGC<br>GCCTCAT<br>GAA            | C | 5418 | ATCGTGC<br>GCCTCAT<br>GAAC           | T | 5498 | ATCGTGC<br>GCCTCAT<br>GAAT           |
| nksdty1_1_1      | ACGTTGG<br>ATGAGGA<br>GTTCCATG<br>ATCGTCAG     | ACGTTG<br>GATGC<br>ACGCA<br>CGGGT<br>TCTTCC<br>AG  | 116 | 89.7 | 75.1 | 47.3 | 53.<br>3 | D  | R | 6062       | GCGACA<br>GCTCCTT<br>CATCTCC<br>TCGC | G | 6309 | atcccTGAT<br>CGTCAGC<br>GACAC        | T | 6333 | atcccTGA<br>TCGTCAG<br>CGACAA        |
| nksdty1_1_1<br>0 | ACGTTGG<br>ATGTTGTG<br>CAGCTATG<br>GAGGAAG     | ACGTTG<br>GATGT<br>GAAAC<br>ACCAAT<br>CCGGC<br>AAG | 117 | 98.9 | 75.1 | 46.4 | 56.<br>2 | d  | F | 5017.<br>3 | GTGTGTG<br>CGGAGAT<br>AG             | C | 5265 | GTGTGTG<br>CGGAGAT<br>AGC            | T | 5344 | GTGTGTG<br>CGGAGAT<br>AGT            |
| nksdty1_1_1<br>1 | ACGTTGG<br>ATGGGCA<br>TGCTACTA<br>GTAAAGA<br>G | ACGTTG<br>GATGT<br>AACACC<br>CAGTTA<br>ACGTG<br>GC | 113 | 97.9 | 75.1 | 50.9 | 40.<br>9 | D  | R | 6976.<br>6 | gCCCAAC<br>ATATCGA<br>TCGAATT<br>CA  | T | 7248 | gCCCAACA<br>TATCGATC<br>GAATTCA<br>A | C | 7264 | gCCCAAC<br>ATATCGA<br>TCGAATT<br>CAG |

|                  |                                                |                                                    |     |      |      |      |          |    |   |            |                                     |   |      |                                      |   |      |                                      |
|------------------|------------------------------------------------|----------------------------------------------------|-----|------|------|------|----------|----|---|------------|-------------------------------------|---|------|--------------------------------------|---|------|--------------------------------------|
| nksdty1_1_1<br>3 | ACGTTGG<br>ATGGGTTT<br>CCATCAAA<br>GCGGAAC     | ACGTTG<br>GATGT<br>GCCGC<br>GTCAA<br>GCAACT<br>CTC | 97  | 94.3 | 75.1 | 57.7 | 63.<br>2 | Dh | R | 6529.<br>3 | aaGGGAG<br>CTGCACA<br>GTGGACA       | G | 6776 | aaGGGAG<br>CTGCACA<br>GTGGACA<br>C   | A | 6856 | aaGGGAG<br>CTGCACA<br>GTGGACA<br>T   |
| nksdty1_1_1<br>5 | ACGTTGG<br>ATGGGTA<br>GTTTTTGC<br>TGCTGCTG     | ACGTTG<br>GATGC<br>ATCCAA<br>GACCAT<br>ACCATG<br>C | 97  | 100  | 75.1 | 46.1 | 53.<br>3 | d  | F | 4630       | TGCATTC<br>TGTGGGT<br>G             | C | 4877 | TGCATTCT<br>GTGGGTG<br>C             | T | 4957 | TGCATTCT<br>GTGGGTG<br>T             |
| nksdty1_1_1<br>8 | ACGTTGG<br>ATGGGCT<br>GCGATGT<br>AGTTTAAG<br>G | ACGTTG<br>GATGA<br>TCTTGT<br>TGCCTG<br>TCTCCA<br>C | 117 | 98.9 | 75.1 | 46.6 | 44.<br>4 | d  | R | 5698.<br>7 | gACATCT<br>CTCCCTT<br>ACTGA         | G | 5946 | gACATCTC<br>TCCCTTAC<br>TGAC         | T | 5970 | gACATCTC<br>TCCCTTAC<br>TGAA         |
| nksdty1_1_2<br>0 | ACGTTGG<br>ATGTATTG<br>ACAAAGG<br>CACCCCTG     | ACGTTG<br>GATGA<br>CACCTA<br>CTTGAA<br>TGCAG<br>AG | 118 | 97.3 | 75.1 | 52.5 | 52.<br>6 | D  | F | 7070.<br>6 | ggatCATG<br>CTTTGCC<br>AGGTTGA<br>C | A | 7342 | ggatCATG<br>CTTTGCCA<br>GGTTGAC<br>A | G | 7358 | ggatCATG<br>CTTTGCC<br>AGGTTGA<br>CG |
| nksdty1_1_2<br>1 | ACGTTGG<br>ATGACTCC<br>TCACCGTG<br>TACTTGC     | ACGTTG<br>GATGT<br>GTTGC<br>GCGGC<br>AAGAT<br>CAAG | 109 | 96.8 | 75.1 | 50.6 | 66.<br>7 | D  | R | 4519.<br>9 | CTTGCCG<br>GCGTCAT<br>C             | G | 4767 | CTTGCCG<br>GCGTCAT<br>CC             | T | 4791 | CTTGCCG<br>GCGTCAT<br>CA             |



|                  |                                                |                                                    |     |      |      |      |          |    |   |            |                                        |   |      |                                         |   |      |                                         |
|------------------|------------------------------------------------|----------------------------------------------------|-----|------|------|------|----------|----|---|------------|----------------------------------------|---|------|-----------------------------------------|---|------|-----------------------------------------|
| nksdty1_1_2<br>3 | ACGTTGG<br>ATGTGGTC<br>GTAGAAG<br>AACTCCTG     | ACGTTG<br>GATGA<br>TGAGC<br>CTGTG<br>GTGGA<br>TGGT | 112 | 95.5 | 75.1 | 58.7 | 81.<br>2 | d  | R | 6178       | acggCGG<br>CGACGCC<br>GACGAG           | G | 6425 | acggCGGC<br>GACGCCG<br>ACGAGC           | T | 6449 | acggCGGC<br>GACGCCG<br>ACGAGA           |
| nksdty1_1_2<br>4 | ACGTTGG<br>ATGCAAC<br>GAGAAAA<br>ACGACGC<br>AC | ACGTTG<br>GATGA<br>TTGCAG<br>GTCCG<br>GTGTCA<br>GT | 100 | 96.1 | 75.1 | 59.2 | 59.<br>1 |    | R | 7810.<br>1 | gcccGCTC<br>TCTTTGC<br>ACAGCCG<br>CTTC | T | 8081 | gcccGCTC<br>TCTTTGCA<br>CAGCCGC<br>TTCA | A | 8137 | gcccGCTC<br>TCTTTGCA<br>CAGCCGC<br>TTCT |
| nksdty1_1_2<br>5 | ACGTTGG<br>ATGCAGCT<br>TCAACAAT<br>AGCAGCC     | ACGTTG<br>GATGG<br>GGAAA<br>AAATA<br>GTCGT<br>GCTC | 100 | 98.6 | 75.1 | 56.9 | 55       | D  | F | 6391.<br>2 | cGCCGCA<br>ATGCTTG<br>AACCTGA          | C | 6638 | cGCCGCA<br>ATGCTTG<br>AACCTGA<br>C      | T | 6718 | cGCCGCA<br>ATGCTTG<br>AACCTGA<br>T      |
| nksdty1_1_2<br>7 | ACGTTGG<br>ATGGCCA<br>GGTTTTGA<br>TGTATGA<br>G | ACGTTG<br>GATGG<br>GCAAA<br>GAGTG<br>AAACG<br>GTTG | 115 | 97.7 | 75.1 | 45.5 | 38.<br>9 | D  | F | 5575.<br>6 | ATATCTT<br>GGTGAG<br>GTTGT             | C | 5823 | ATATCTTG<br>GTGAGGT<br>TGTC             | T | 5903 | ATATCTT<br>GGTGAGG<br>TTGTT             |
| nksdty1_1_2<br>8 | ACGTTGG<br>ATGCGGT<br>GCATCATA<br>GTCATAGC     | ACGTTG<br>GATGC<br>CTTTTG<br>AAGTA<br>CCATG<br>GTG | 105 | 98.5 | 75.1 | 47.4 | 60       | Ds | R | 4553       | TCCAGTA<br>GTGCGAC<br>C                | T | 4824 | TCCAGTA<br>GTGCGAC<br>CA                | C | 4840 | TCCAGTA<br>GTGCGAC<br>CG                |

|                  |                                                 |                                                     |     |      |      |      |          |    |   |            |                                         |   |      |                                          |   |      |                                          |
|------------------|-------------------------------------------------|-----------------------------------------------------|-----|------|------|------|----------|----|---|------------|-----------------------------------------|---|------|------------------------------------------|---|------|------------------------------------------|
| nksdty1_1_2<br>9 | ACGTTGG<br>ATGCAAC<br>ATCCTGGT<br>AATTCCCC      | ACGTTG<br>GATGC<br>AATTCA<br>AAAGA<br>CATGCT<br>GGG | 117 | 93.4 | 75.1 | 50.2 | 36.<br>4 | d  | F | 6684.<br>4 | TACCATT<br>TTGCCAG<br>ATATGCT<br>A      | C | 6932 | TACCATTT<br>TGCCAGA<br>TATGCTAC          | T | 7012 | TACCATTT<br>TGCCAGA<br>TATGCTA<br>T      |
| nksdty1_1_3<br>0 | ACGTTGG<br>ATGTCTTT<br>CCCAACTA<br>CGTACGC      | ACGTTG<br>GATGT<br>GTGCA<br>GTTAGC<br>TAGTGC<br>AG  | 99  | 100  | 75.1 | 48.7 | 52.<br>9 | D  | F | 5210.<br>4 | GAGCTTG<br>GTGCAAA<br>CTC               | C | 5458 | GAGCTTG<br>GTGCAAA<br>CTCC               | T | 5538 | GAGCTTG<br>GTGCAAA<br>CTCT               |
| nksdty1_1_3<br>4 | ACGTTGG<br>ATGACAG<br>CAGCATGT<br>GATCAGA<br>C  | ACGTTG<br>GATGG<br>AAAAC<br>AGGGC<br>GGTGA<br>TCTC  | 106 | 98.4 | 75.1 | 49.4 | 33.<br>3 | D  | R | 7399.<br>8 | CCAGATT<br>TGGAGA<br>ATAATAA<br>TGCT    | T | 7671 | CCAGATTT<br>GGAGAAT<br>AATAATG<br>CTA    | A | 7727 | CCAGATT<br>TGGAGAA<br>TAATAAT<br>GCTT    |
| nksdty1_1_3<br>8 | ACGTTGG<br>ATGCATGT<br>TCAAATTA<br>TACCTGG<br>G | ACGTTG<br>GATGA<br>ATCATG<br>ACCTG<br>GTAAAT<br>GG  | 107 | 81   | 75.1 | 49.8 | 34.<br>8 | h  | F | 8242.<br>4 | cttcTACC<br>TGGGAA<br>AAAAGTT<br>CAATTC | A | 8514 | cttcTACCT<br>GGGAAAA<br>AAGTTCA<br>ATTCA | G | 8530 | cttcTACCT<br>GGGAAAA<br>AAGTTCA<br>ATTCG |
| nksdty1_1_4<br>0 | ACGTTGG<br>ATGCAGA<br>GCTTGACC<br>TCGAGGA<br>A  | ACGTTG<br>GATGCT<br>ACGGG<br>ATCTTC<br>CTCGTC       | 80  | 90.7 | 75.1 | 54.2 | 64.<br>7 | dS | R | 6899.<br>5 | gggctAGG<br>AAGACG<br>GCGACG<br>AG      | G | 7147 | gggctAGG<br>AAGACGG<br>CGACGAG<br>C      | C | 7187 | gggctAGG<br>AAGACGG<br>CGACGAG<br>G      |

|                  |                                                |                                                    |     |      |      |      |          |   |   |            |                                         |   |      |                                          |   |      |                                          |
|------------------|------------------------------------------------|----------------------------------------------------|-----|------|------|------|----------|---|---|------------|-----------------------------------------|---|------|------------------------------------------|---|------|------------------------------------------|
| nksdty1_1_4<br>2 | ACGTTGG<br>ATGCTACC<br>AGAAAGC<br>CTTGCTTG     | ACGTTG<br>GATGG<br>TGTAAT<br>TTGGG<br>AAGGT<br>AGG | 99  | 98.6 | 75.1 | 54.2 | 45.<br>5 | d | R | 8397.<br>5 | gggtaAGC<br>TGGGCAT<br>GAAAATG<br>AACTC | G | 8645 | gggtaAGC<br>TGGGCAT<br>GAAAATG<br>AACTCC | A | 8725 | gggtaAGC<br>TGGGCAT<br>GAAAATG<br>AACTCT |
| nksdty1_1_4<br>4 | ACGTTGG<br>ATGCTCAG<br>AAACAGT<br>AGAGACA<br>G | ACGTTG<br>GATGG<br>AACAA<br>GAGCTT<br>CAGGA<br>ATC | 101 | 97.1 | 75.1 | 45.8 | 33.<br>3 | D | F | 7640       | tctcAACA<br>GTAGAG<br>ACAGATT<br>TTTC   | A | 7911 | tctcAACA<br>GTAGAGA<br>CAGATTTT<br>TCA   | G | 7927 | tctcAACA<br>GTAGAGA<br>CAGATTT<br>TTCG   |
| nksdty1_1_4<br>5 | ACGTTGG<br>ATGTGTG<br>GATGATA<br>GTACTAG<br>GC | ACGTTG<br>GATGC<br>AGCATT<br>TCTTGC<br>TTCCCA<br>G | 107 | 98.4 | 75.1 | 47.3 | 38.<br>1 | D | R | 7763.<br>1 | gagtATAG<br>TACTAGG<br>CATGAAA<br>CAG   | G | 8010 | gagtATAG<br>TACTAGG<br>CATGAAA<br>CAGC   | C | 8050 | gagtATAG<br>TACTAGG<br>CATGAAA<br>CAGG   |
| nksdty1_1_4<br>6 | ACGTTGG<br>ATGGAATT<br>CCAATGTG<br>GTAGGCG     | ACGTTG<br>GATGTT<br>TGCAG<br>CAGTCA<br>ATGTG<br>GG | 83  | 98.9 | 75.1 | 55.2 | 50       | d | R | 8404.<br>5 | gtgcaAAT<br>GTGGTAG<br>GCGGAAT<br>GACTC | T | 8676 | gtgcaAAT<br>GTGGTAG<br>GCGGAAT<br>GACTCA | C | 8692 | gtgcaAAT<br>GTGGTAG<br>GCGGAAT<br>GACTCG |
| nksdty1_1_4<br>7 | ACGTTGG<br>ATGTGGA<br>TACCCTCT<br>TCAGCAAC     | ACGTTG<br>GATGG<br>AAACT<br>GAAGC<br>ATAGTT<br>CTC | 119 | 93   | 75.1 | 50.8 | 29.<br>6 | D | F | 8330.<br>5 | AGCAACA<br>TCTGTAG<br>TAAATAG<br>TAAGTT | C | 8578 | AGCAACA<br>TCTGTAGT<br>AAATAGT<br>AAGTTC | A | 8602 | AGCAACA<br>TCTGTAG<br>TAAATAG<br>TAAGTTA |

Table S7: Fst values of the genotypes grouping 123 genotypes into four different subpopulations.

| Genotype     | Fst1  | Fst2  | Fst3  | Fst4  |
|--------------|-------|-------|-------|-------|
| AIJIAONANTE  | 0.013 | 0.114 | 0.008 | 0.865 |
| ANNADA       | 0.003 | 0.018 | 0.015 | 0.965 |
| Apo          | 0.005 | 0.19  | 0.01  | 0.795 |
| BALAM        | 0.01  | 0.169 | 0.709 | 0.112 |
| BASHFUL      | 0.008 | 0.548 | 0.02  | 0.424 |
| BASMATI334   | 0.917 | 0.024 | 0.019 | 0.04  |
| BASMATI370   | 0.856 | 0.022 | 0.065 | 0.057 |
| BENGAWAN     | 0.004 | 0.971 | 0.007 | 0.018 |
| BETONAN      | 0.013 | 0.91  | 0.031 | 0.046 |
| BHADOIA233   | 0.011 | 0.012 | 0.966 | 0.011 |
| BINNATOHA    | 0.004 | 0.011 | 0.975 | 0.01  |
| Blackgora    | 0.003 | 0.004 | 0.989 | 0.004 |
| BPIR110      | 0.013 | 0.324 | 0.008 | 0.656 |
| BR1          | 0.005 | 0.007 | 0.982 | 0.006 |
| BR11         | 0.005 | 0.59  | 0.016 | 0.389 |
| BR2          | 0.005 | 0.06  | 0.891 | 0.044 |
| BR21         | 0.006 | 0.278 | 0.008 | 0.707 |
| Browngora    | 0.003 | 0.003 | 0.99  | 0.004 |
| CHAMPATONG54 | 0.006 | 0.965 | 0.005 | 0.023 |
| CHAU         | 0.02  | 0.056 | 0.006 | 0.918 |
| CHIEMCHANH   | 0.011 | 0.017 | 0.009 | 0.963 |
| CHINIGURA    | 0.008 | 0.92  | 0.015 | 0.057 |
| CIKAPUNDUNG  | 0.004 | 0.974 | 0.005 | 0.017 |
| CO18         | 0.006 | 0.008 | 0.977 | 0.009 |
| CO25         | 0.005 | 0.008 | 0.978 | 0.008 |
| CR1014       | 0.008 | 0.782 | 0.037 | 0.173 |
| DAVAO        | 0.011 | 0.655 | 0.212 | 0.122 |

|                 |       |       |       |       |
|-----------------|-------|-------|-------|-------|
| DEE-GEO-WOO-GEN | 0.003 | 0.085 | 0.007 | 0.905 |
| Dhagaddeshi     | 0.008 | 0.313 | 0.303 | 0.376 |
| DHALASAITA      | 0.014 | 0.043 | 0.923 | 0.021 |
| DHOLIBORO       | 0.006 | 0.005 | 0.984 | 0.005 |
| DINORADO        | 0.988 | 0.004 | 0.004 | 0.003 |
| DURGABHOG       | 0.979 | 0.008 | 0.006 | 0.007 |
| GIE57           | 0.007 | 0.319 | 0.009 | 0.665 |
| DULAR           | 0.004 | 0.01  | 0.977 | 0.009 |
| HOING           | 0.004 | 0.942 | 0.005 | 0.049 |
| IR156122833     | 0.004 | 0.631 | 0.009 | 0.356 |
| IR36            | 0.011 | 0.011 | 0.967 | 0.011 |
| IR42            | 0.004 | 0.062 | 0.791 | 0.143 |
| IR64            | 0.007 | 0.064 | 0.012 | 0.917 |
| IR8             | 0.004 | 0.104 | 0.007 | 0.885 |
| IR743714611     | 0.037 | 0.235 | 0.013 | 0.714 |
| IR743717011     | 0.005 | 0.081 | 0.007 | 0.908 |
| IRRI119         | 0.003 | 0.056 | 0.006 | 0.935 |
| IRRI123         | 0.005 | 0.352 | 0.008 | 0.634 |
| IRRI141         | 0.004 | 0.318 | 0.005 | 0.673 |
| JAGANATH        | 0.006 | 0.647 | 0.068 | 0.279 |
| JAYA            | 0.004 | 0.519 | 0.041 | 0.436 |
| JC148           | 0.003 | 0.009 | 0.979 | 0.009 |
| JHONA349        | 0.012 | 0.452 | 0.164 | 0.372 |
| JIRASAIL        | 0.009 | 0.314 | 0.156 | 0.522 |
| JOYNA           | 0.011 | 0.676 | 0.011 | 0.302 |
| KAJALSAIL       | 0.03  | 0.352 | 0.549 | 0.068 |
| Kalakeri        | 0.003 | 0.004 | 0.987 | 0.005 |
| KALAMKATI       | 0.004 | 0.076 | 0.018 | 0.902 |
| KALIJIRA        | 0.972 | 0.009 | 0.009 | 0.01  |
| KAOTAHKONG      | 0.008 | 0.929 | 0.009 | 0.054 |
| KASALATH        | 0.004 | 0.048 | 0.625 | 0.322 |

|                    |       |       |       |       |
|--------------------|-------|-------|-------|-------|
| KATARIBHOG         | 0.003 | 0.122 | 0.011 | 0.863 |
| KHAODAWKMALI105    | 0.006 | 0.967 | 0.007 | 0.02  |
| KHAOGAEW           | 0.006 | 0.87  | 0.024 | 0.099 |
| KHAOHAWM           | 0.005 | 0.323 | 0.019 | 0.653 |
| KHAOTAHOO          | 0.014 | 0.884 | 0.004 | 0.097 |
| KHAOTAHHAENG       | 0.015 | 0.801 | 0.034 | 0.149 |
| KHAOTAHPIENG       | 0.006 | 0.942 | 0.006 | 0.046 |
| KU1131             | 0.006 | 0.915 | 0.008 | 0.072 |
| LALSAR             | 0.015 | 0.455 | 0.111 | 0.419 |
| LATISAIL           | 0.003 | 0.936 | 0.007 | 0.053 |
| LEUANGYAINONG      | 0.008 | 0.966 | 0.005 | 0.021 |
| MACANBINUNDOK      | 0.005 | 0.468 | 0.006 | 0.521 |
| MAGAWKDONG26977(9) | 0.987 | 0.004 | 0.004 | 0.005 |
| MAHSURI            | 0.008 | 0.894 | 0.019 | 0.079 |
| MAKMUR             | 0.003 | 0.971 | 0.004 | 0.022 |
| MARINAH            | 0.003 | 0.934 | 0.013 | 0.05  |
| MOHINISAIL         | 0.006 | 0.501 | 0.051 | 0.442 |
| MTU1010            | 0.005 | 0.064 | 0.006 | 0.924 |
| MUEYNONG(WANGDIN)  | 0.525 | 0.114 | 0.171 | 0.19  |
| N22                | 0.003 | 0.004 | 0.987 | 0.005 |
| NAN THE AO         | 0.004 | 0.177 | 0.014 | 0.805 |
| NAZIRSAIL          | 0.004 | 0.966 | 0.005 | 0.025 |
| NIAW               | 0.007 | 0.64  | 0.067 | 0.285 |
| NSICRc192          | 0.007 | 0.263 | 0.009 | 0.72  |
| NSICRc222          | 0.009 | 0.112 | 0.011 | 0.868 |
| NSICRC9            | 0.004 | 0.242 | 0.013 | 0.741 |
| PANKAJ(IR511431)   | 0.004 | 0.957 | 0.005 | 0.034 |
| PELITAI1           | 0.004 | 0.969 | 0.005 | 0.022 |
| PELITAI2           | 0.005 | 0.966 | 0.007 | 0.023 |
| PSBRC68            | 0.003 | 0.047 | 0.006 | 0.944 |
| PSBRC80            | 0.023 | 0.102 | 0.006 | 0.869 |

|                    |       |       |       |       |
|--------------------|-------|-------|-------|-------|
| PSBRc82            | 0.036 | 0.674 | 0.046 | 0.243 |
| PURBACHI(CHINESE1) | 0.003 | 0.124 | 0.012 | 0.861 |
| RASI               | 0.009 | 0.59  | 0.006 | 0.395 |
| RATNA              | 0.003 | 0.045 | 0.005 | 0.947 |
| RD1                | 0.003 | 0.093 | 0.006 | 0.897 |
| RD15               | 0.005 | 0.669 | 0.019 | 0.306 |
| RD2                | 0.003 | 0.774 | 0.012 | 0.21  |
| RD25               | 0.003 | 0.54  | 0.006 | 0.451 |
| RD6                | 0.006 | 0.686 | 0.017 | 0.291 |
| RD7                | 0.005 | 0.852 | 0.01  | 0.133 |
| RD9                | 0.023 | 0.131 | 0.137 | 0.709 |
| RTS12              | 0.006 | 0.071 | 0.007 | 0.917 |
| RTS14              | 0.013 | 0.829 | 0.037 | 0.121 |
| RTS5               | 0.023 | 0.378 | 0.011 | 0.588 |
| SAFRI17            | 0.019 | 0.495 | 0.013 | 0.473 |
| Sambamahsuri       | 0.005 | 0.029 | 0.019 | 0.947 |
| SARJOO50           | 0.007 | 0.04  | 0.011 | 0.942 |
| SARJOO 49          | 0.005 | 0.7   | 0.007 | 0.288 |
| SATHI-34-36        | 0.005 | 0.032 | 0.94  | 0.023 |
| SMAGUING           | 0.983 | 0.004 | 0.005 | 0.008 |
| SINAMPAGASELECTION | 0.988 | 0.004 | 0.005 | 0.003 |
| SOMCAU70A          | 0.006 | 0.241 | 0.016 | 0.737 |
| SWARNA             | 0.006 | 0.553 | 0.013 | 0.428 |
| T1                 | 0.01  | 0.011 | 0.947 | 0.032 |
| T136               | 0.008 | 0.06  | 0.893 | 0.039 |
| TADUKAN            | 0.007 | 0.063 | 0.008 | 0.922 |
| TAICHUNG65         | 0.005 | 0.007 | 0.981 | 0.007 |
| TAICHUNGNATIVE1    | 0.004 | 0.007 | 0.982 | 0.007 |
| TKM6               | 0.092 | 0.675 | 0.009 | 0.223 |
| UPLRI4             | 0.006 | 0.204 | 0.009 | 0.781 |
| UPLRI7             | 0.007 | 0.585 | 0.004 | 0.405 |

|           |       |       |       |       |
|-----------|-------|-------|-------|-------|
| Vandana   | 0.089 | 0.805 | 0.074 | 0.033 |
| WAGWAG    | 0.201 | 0.631 | 0.009 | 0.16  |
| ZHENSHAN2 | 0.02  | 0.097 | 0.017 | 0.866 |

---
